# Supplementary material for: Use of Guselkumab for the Treatment of Moderate-to-Severe Plaque Psoriasis: A 1 Year Real-Life Study
Source: PubMed Central journal article supplement (PMC7408922; doi:10.3390/jcm9072170), 2020-07-09
Supplement: jcm-09-02170-s001.pdf [file jcm-09-02170-s001.pdf]

# Supplementary Materials: Use of Guselkumab for the Treatment of Moderate-to-Severe Plaque Psoriasis: a 1 Year Real-Life Study

Marco Galluzzo, Lorenzo Tofani, Paolo Lombardo, Alessandra Petruzzellis, Dionisio Silvaggio, Colin Gerard Egan, Luca Bianchi and Marina Talamonti

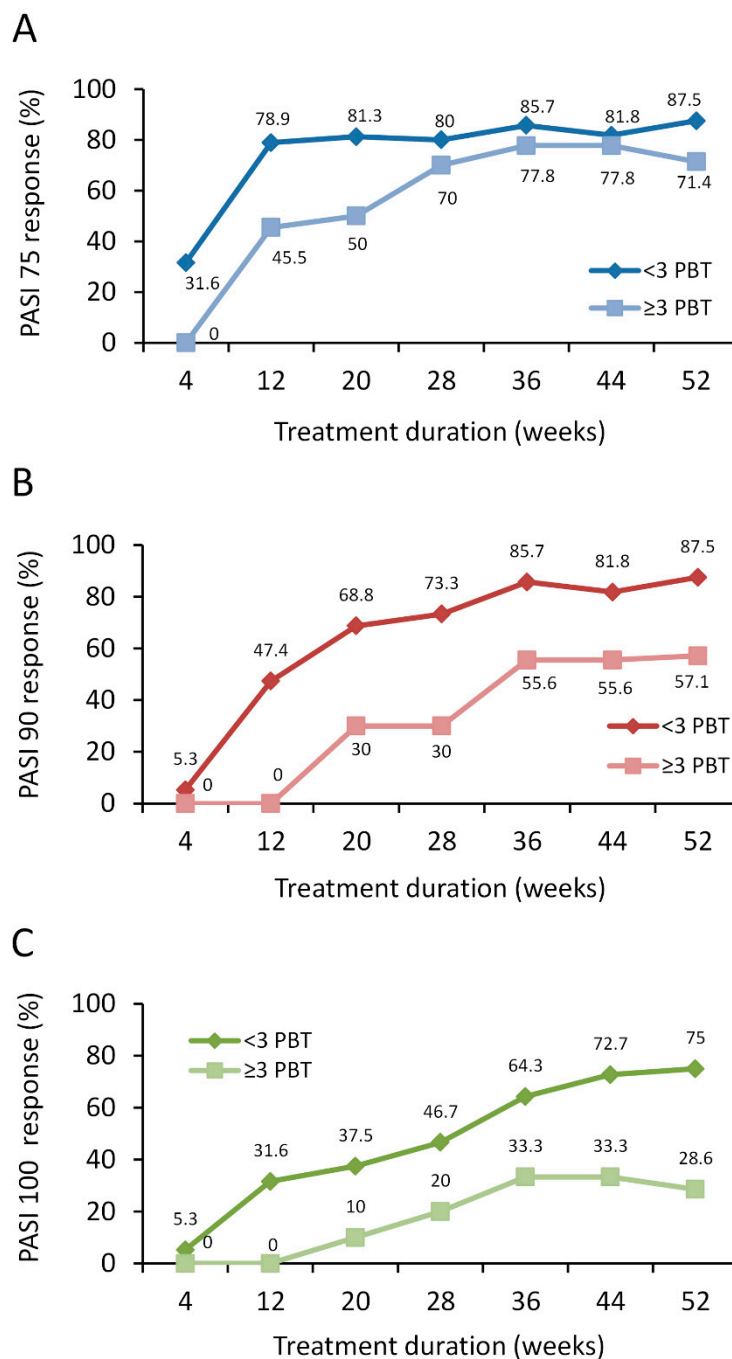

**Figure S1.** Effect of guselkumab in psoriatic patients on achievement of PASI 75 (A), 90 (B) and 100 (C) response in patient subgroups over 1 year: effect of <3 (N = 19) or ≥3 PBTs (N = 11). The % patients achieving PASI 75, 90 and 100 response are presented for each time point. The % of patients at each time point is shown.

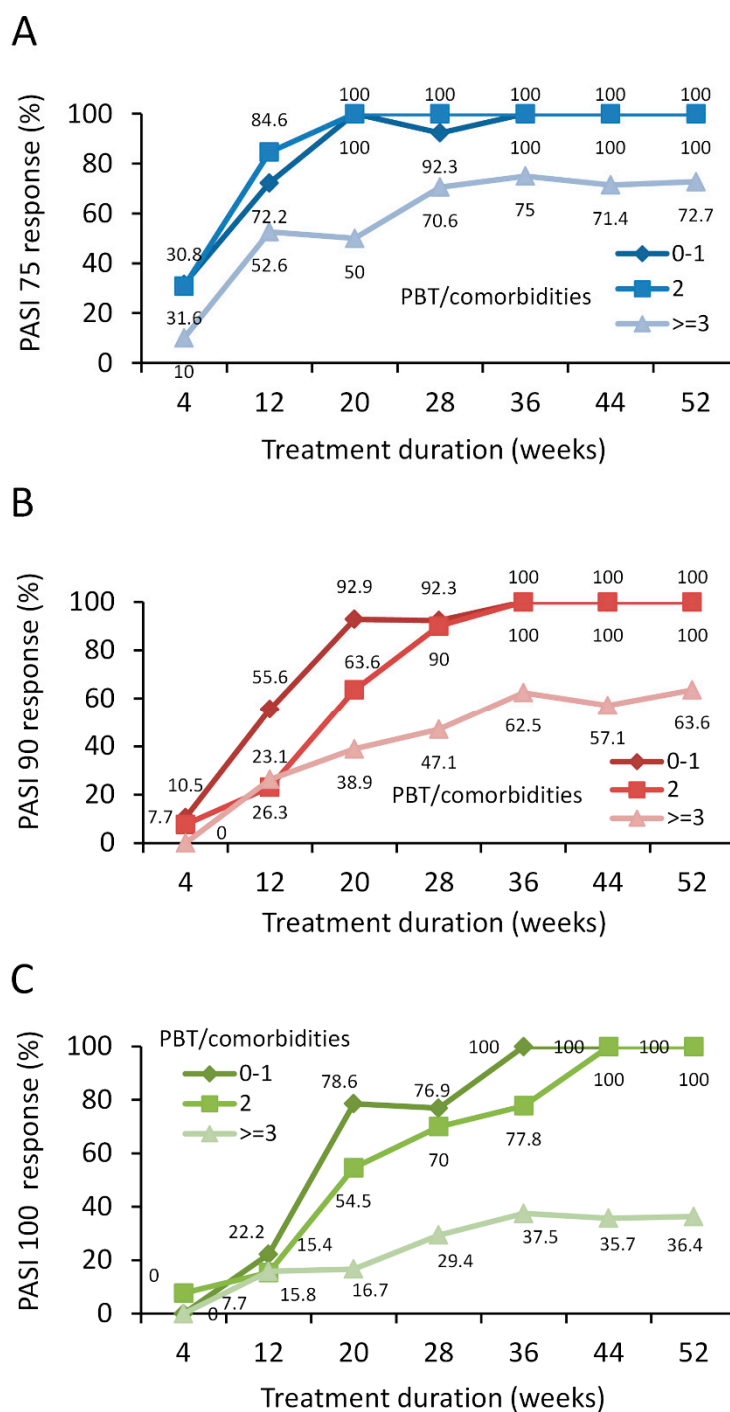

**Figure S2.** Effect of guselkumab in psoriatic patients on achievement of PASI 75 (A), 90 (B) and 100 (C) response in patient subgroups over 1 year: effect of combined PBTs and comorbid diseases. The % patients achieving PASI 75, 90 and 100 response are presented for each time point. 0–1 PBT/comorbidities (N = 19); 2 PBT/comorbidities (N = 13); ≥3 PBT/comorbidities (N = 20). The % of patients at each time point is shown.

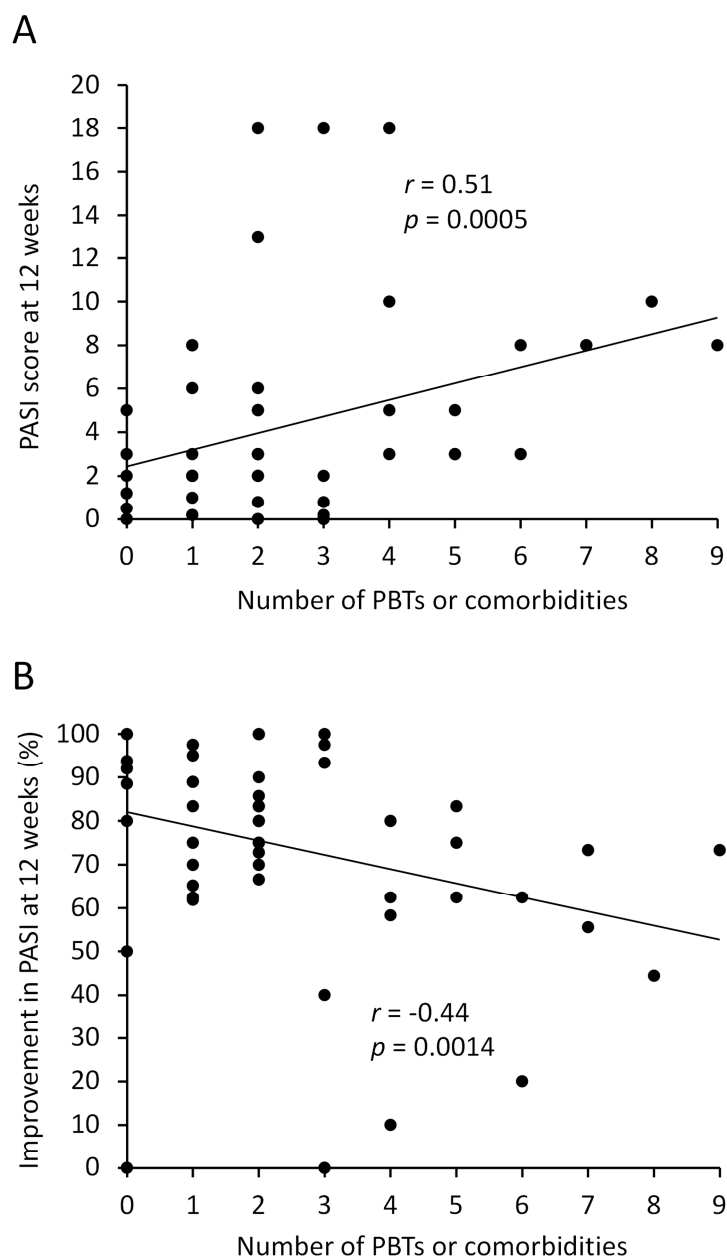

**Figure S3.** Association between the number of PBTs and/or comorbid diseases on PASI score or improvement in PASI score at 12 weeks. **(A)** The number of patients with PBTs and/or comorbid diseases positively correlates ( $r = 0.51$ ,  $p = 0.0005$ ) with PASI score at 12 weeks; **(B)** the inverse being observed ( $r = -0.44$ ,  $p = 0.0014$ ) when the number of patients with PBTs and/or comorbid diseases is plotted against improvement in PASI (%) at 12 weeks (compared to baseline).
